# Supplementary material
Source: HighWire-hosted journal article supplement (https://rmdopen.bmj.com/content/8/2/e002696)
Supplement: inline-supplementary-material-1 [file inline-supplementary-material-1.pdf]

|                                                                     | HLA-B27 available<br>(N=790) |       | HLA-B27 not available<br>(N = 676) |       | p      |
|---------------------------------------------------------------------|------------------------------|-------|------------------------------------|-------|--------|
|                                                                     | N/mean                       | %/SD  | N/mean                             | %/SD  |        |
| <b>Men</b>                                                          | 401                          | 50.8% | 303                                | 44.8% | 0.023  |
| <b>Family history</b>                                               | 262                          | 33.2% | 238                                | 35.2% | 0.411  |
| <b>Age (y)</b>                                                      | 47.8                         | 14.2  | 51.7                               | 13.1  | <0.001 |
| <b>Age onset (y)</b>                                                | 33.3                         | 14.2  | 36.8                               | 15.3  | <0.001 |
| <b>Age at diagnosis (y)</b>                                         | 40.7                         | 14.2  | 44.5                               | 13.4  | <0.001 |
| <b>Diagnosis delay (m)</b>                                          | 7.5                          | 10.2  | 7.8                                | 10.3  | 0.505  |
| <b>Disease duration (y)</b>                                         | 14.6                         | 12    | 15.0                               | 11.8  | 0.491  |
| <b>Psoriatic arthritis</b>                                          | 474                          | 60%   | 559                                | 82.7% | <0.001 |
| <b>Mono/oligoarticular pattern</b>                                  | 352/716                      | 49.2% | 254/632                            | 40.2% | 0.001  |
| <b>Tarsitis</b>                                                     | 99                           | 12.5% | 66                                 | 9.8%  | 0.094  |
| <b>Enthesitis</b>                                                   | 397                          | 50.3% | 324                                | 47.9% | 0.375  |
| <b>Dactylitis</b>                                                   | 241                          | 30.5% | 241                                | 35.7% | 0.037  |
| <b>Peripheral structural damage</b>                                 | 163                          | 20.6% | 209                                | 30.9% | <0.001 |
| <b>Axial involvement</b>                                            | 362                          | 45.8% | 243                                | 35.9% | <0.001 |
| <b>Radiographic sacroilitis (AS*<br/>mNY* criteria fulfillment)</b> | 196/721                      | 27.2% | 162/532                            | 30.5% | 0.206  |
| <b>Shoulder involvement</b>                                         | 145                          | 18.4% | 95                                 | 14.1% | 0.027  |
| <b>Hip involvement</b>                                              | 181                          | 22.9% | 102                                | 15.1% | <0.001 |
| <b>Psoriasis</b>                                                    | 487                          | 61.6% | 523                                | 77.4% | <0.001 |
| <b>Uveitis</b>                                                      | 75                           | 9.5%  | 27                                 | 4.0%  | <0.001 |
| <b>If uveitis, number of episodes</b>                               | 6.5                          | 8.7   | 4.5                                | 4.8   | 0.268  |
| <b>IBD*</b>                                                         | 18                           | 3.3%  | 13                                 | 1.9%  | 0.637  |
| <b>Fibromyalgia</b>                                                 | 79                           | 10%   | 89                                 | 13.2% | 0.058  |

Supplementary table 1: Characteristics of patients with and without HLA-B27 available.

\*AS: Ankylosing Spondylitis; mNY: New York modified; IBD: Inflammatory Bowel Disease.
